# Supplementary material for: TRAF4-mediated ubiquitination-dependent activation of JNK/Bcl-xL drives radioresistance
Source: PubMed Central journal article supplement (PMC9918491; doi:10.1038/s41419-023-05637-y), 2023-02-10

**Figure S7 a, Full gel for Figure 1B**

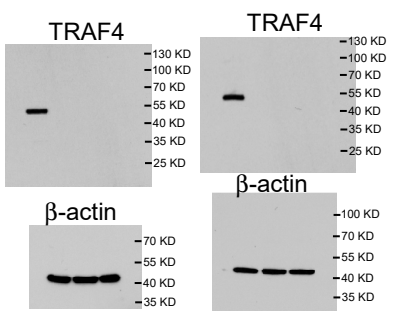

**Figure S7 b, Full gel for Figure 2**

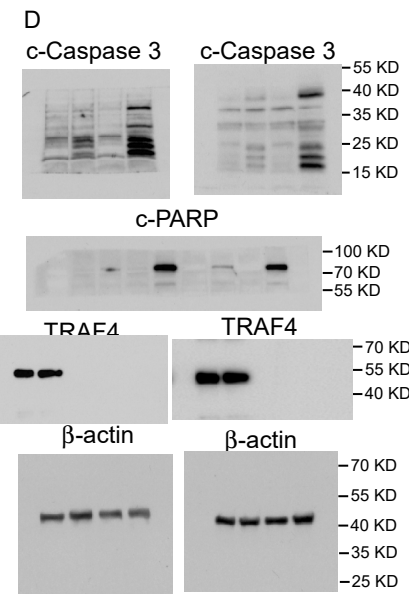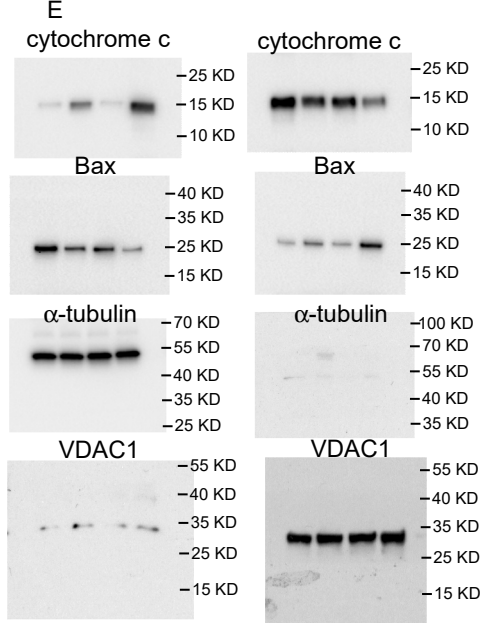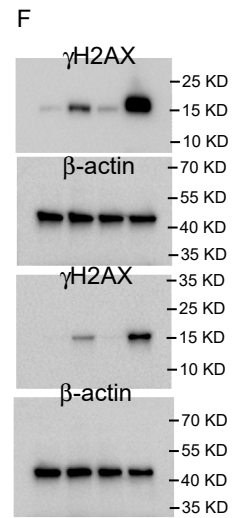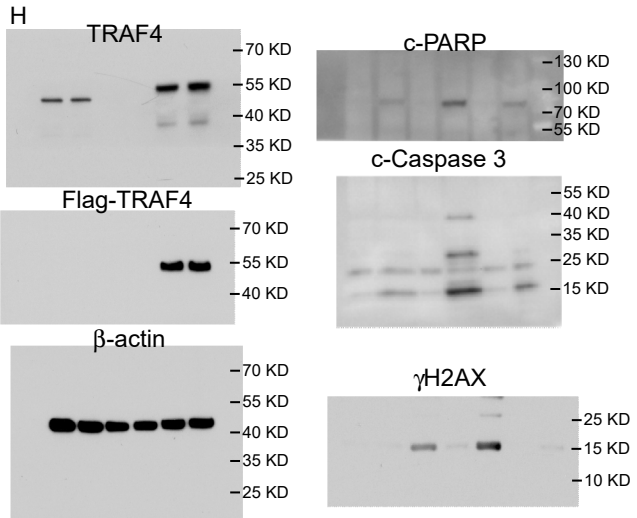

**Figure S7 c, Full gel for Figure 3**

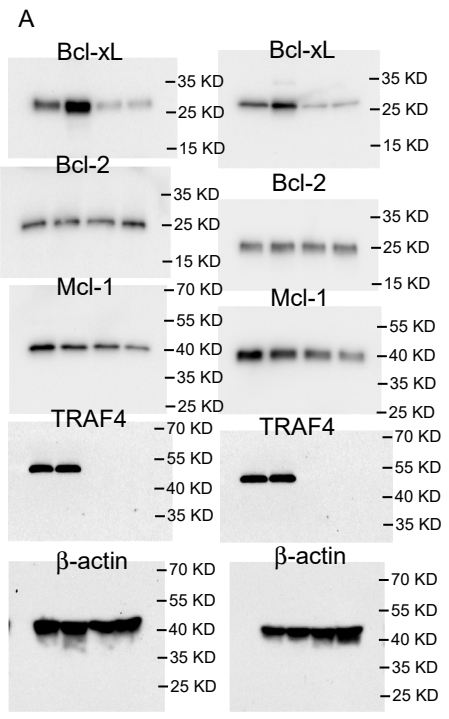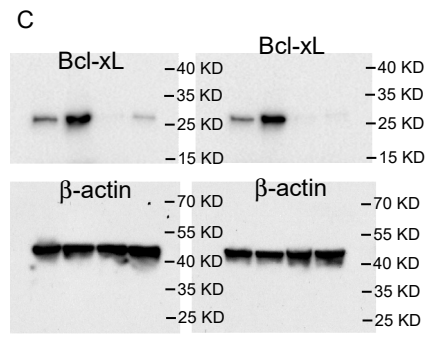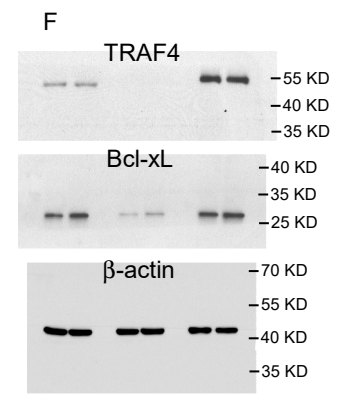

**Figure S7 d, Full gel for Figure 4**

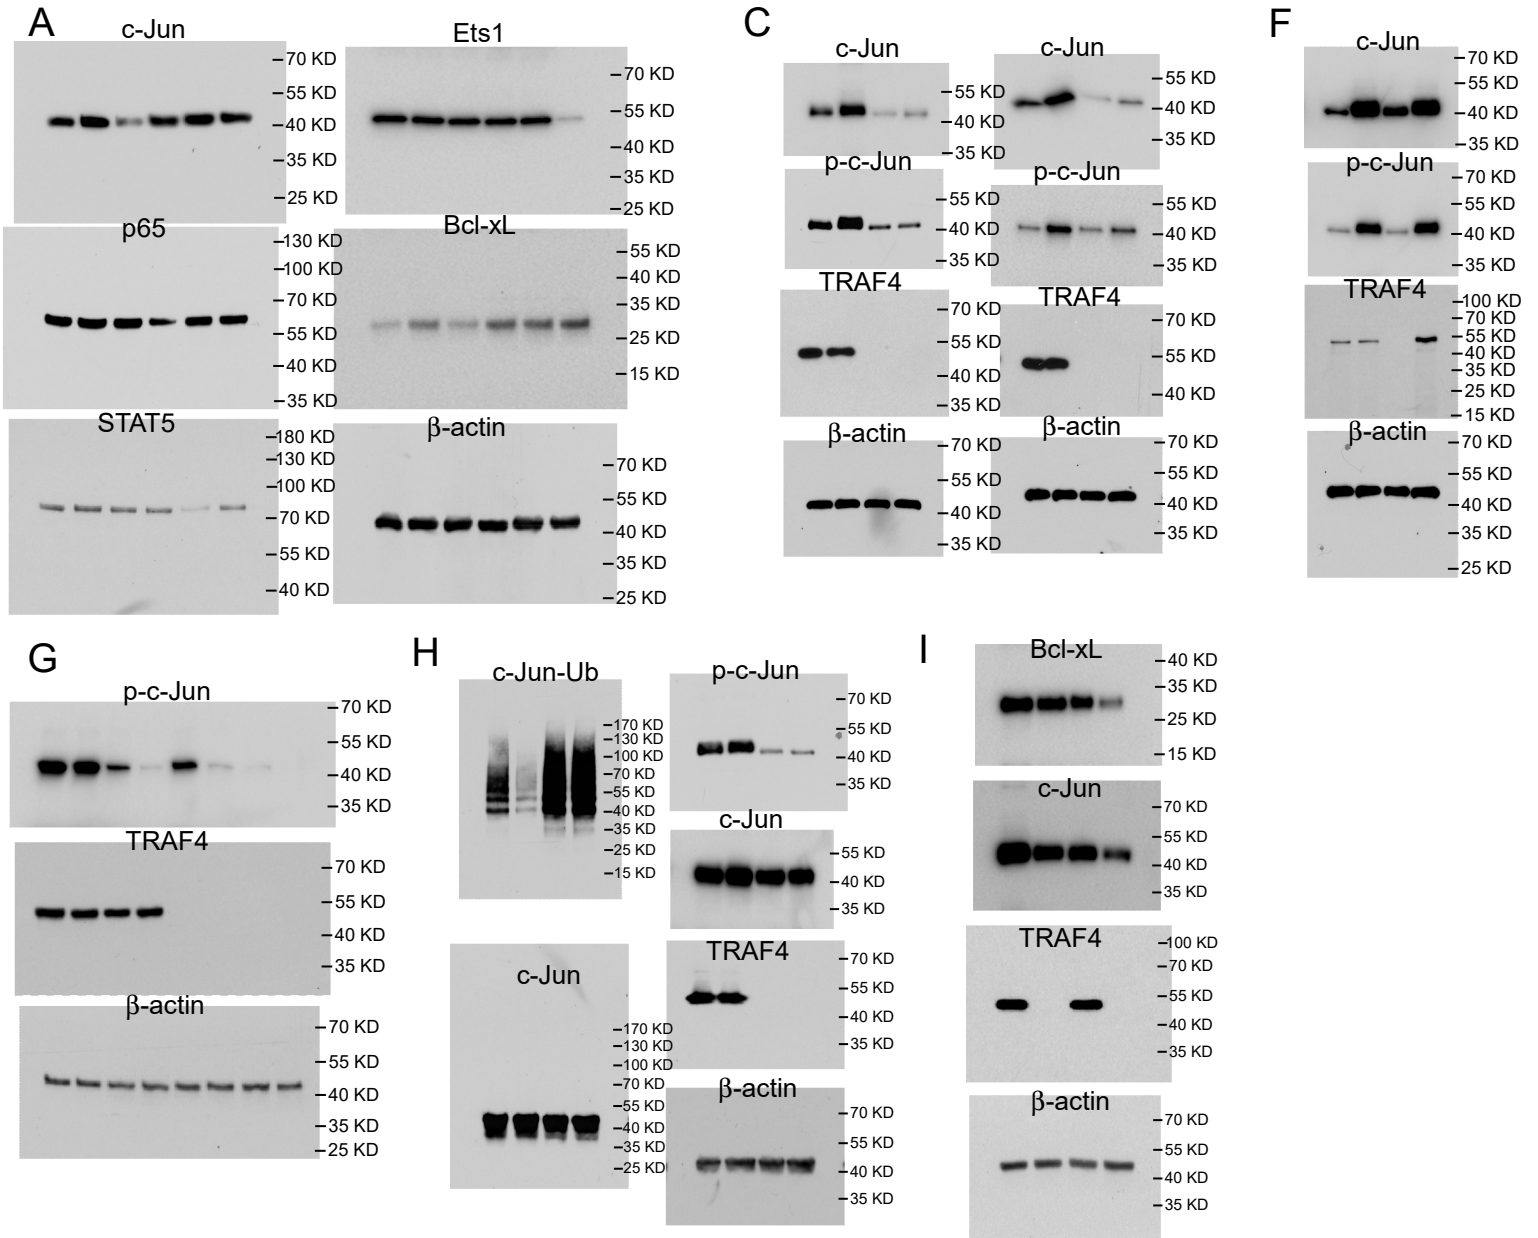

**Figure S7 e, Full gel for Figure 5**

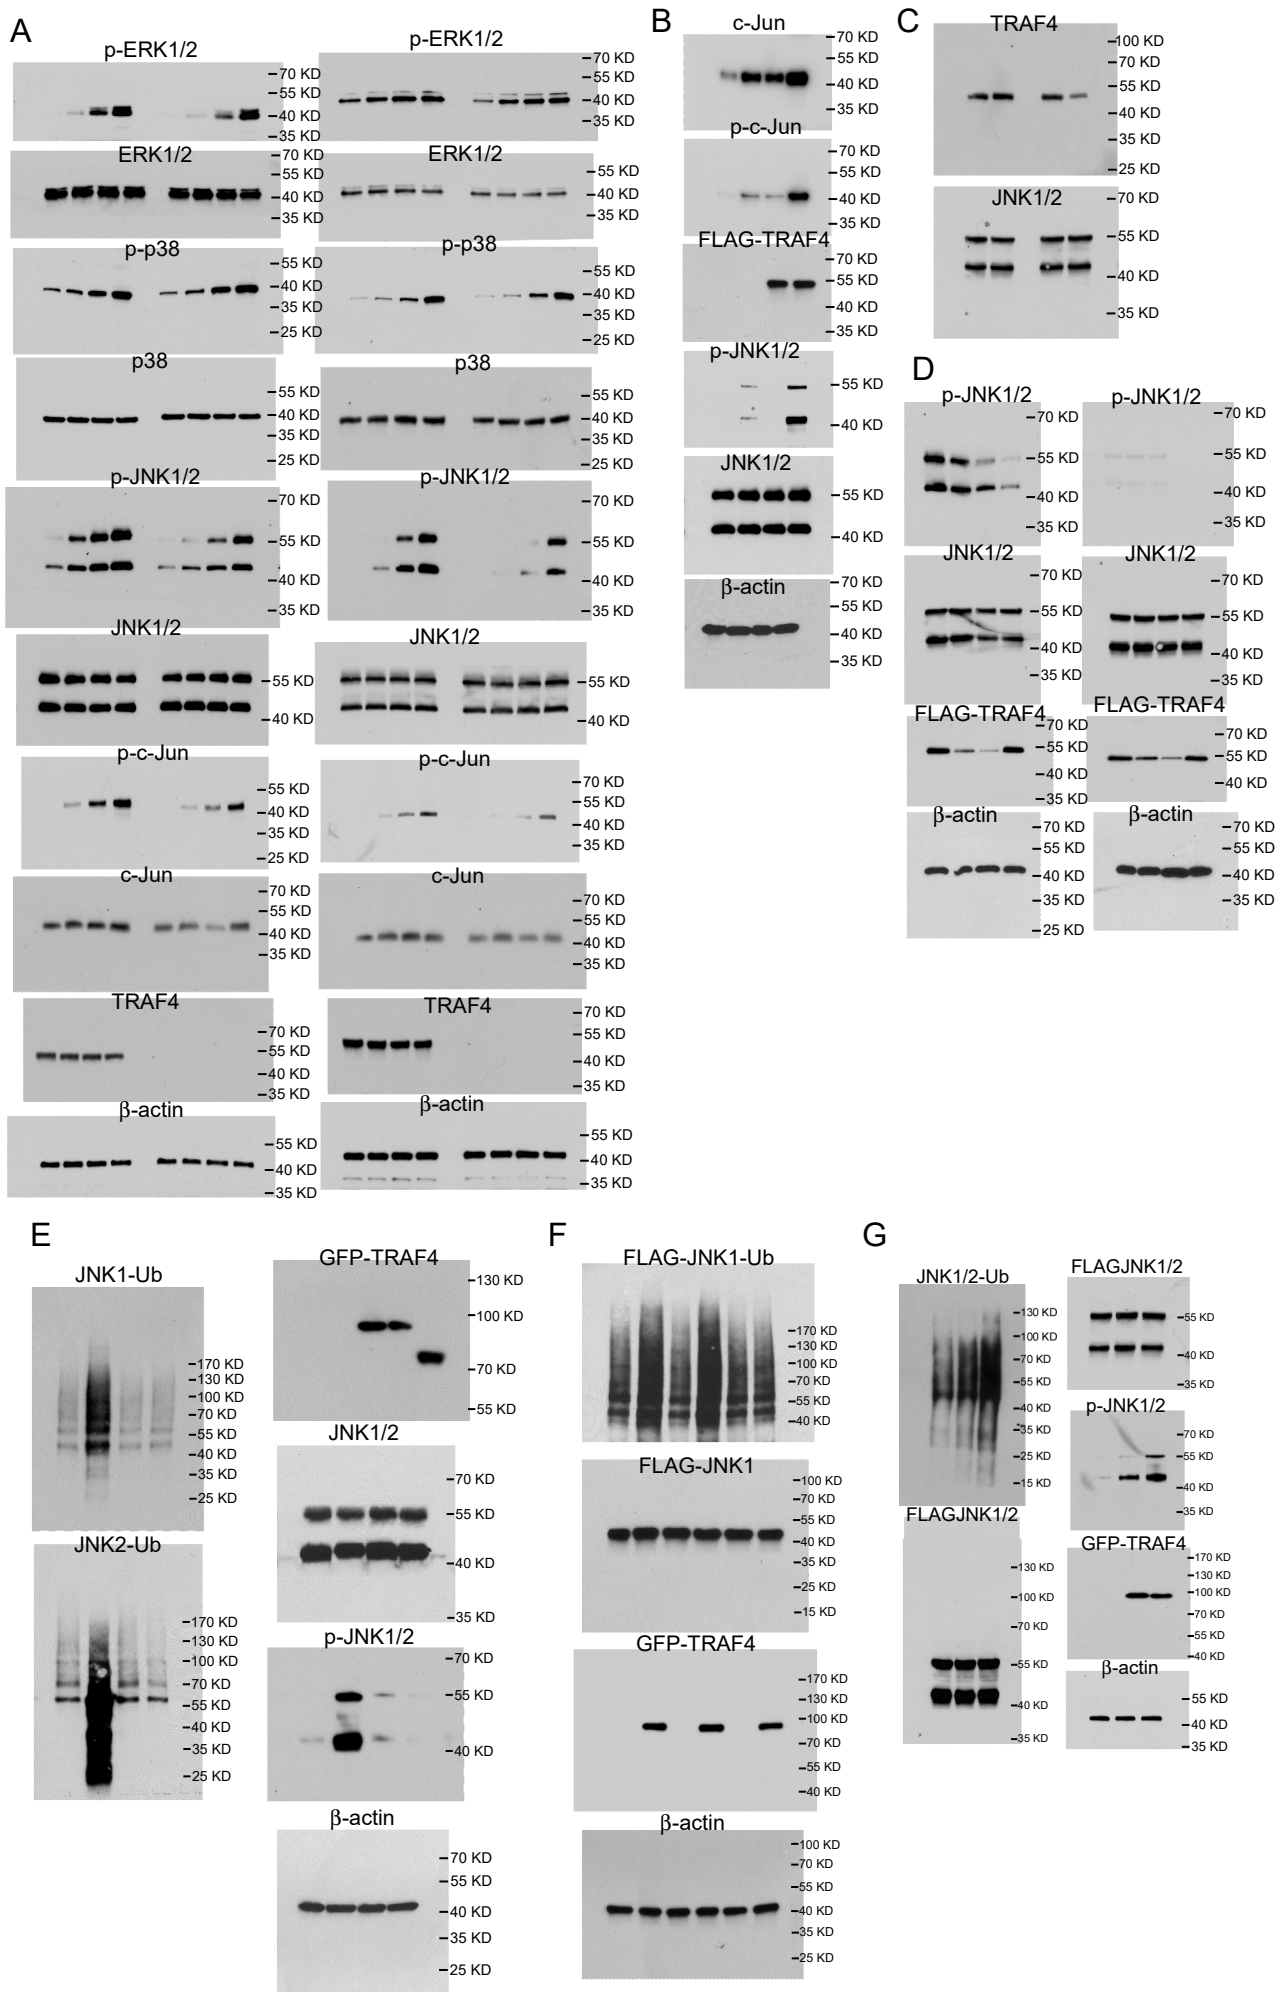

**Figure S7 f, Full gel for Figure 8G**

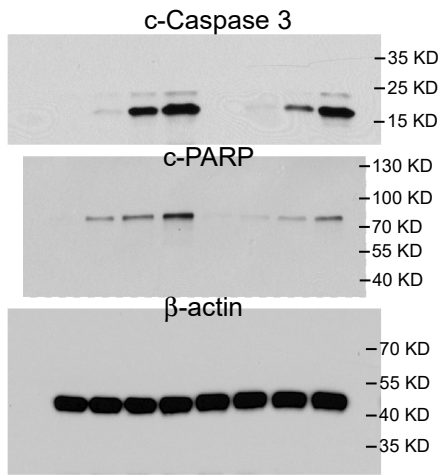

**Figure S7 g, Full gel for Supplementary Figure 3D**

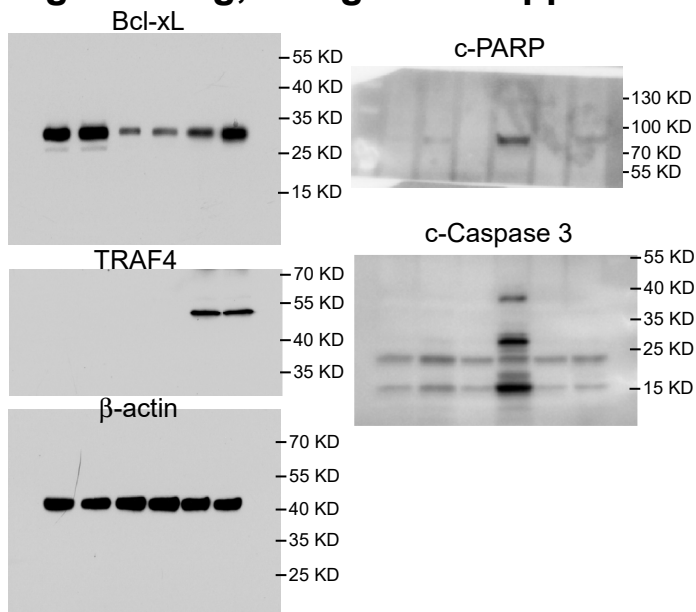

**Figure S7 h, Full gel for Supplementary Figure 6**

**Supplementary Figure 6A**

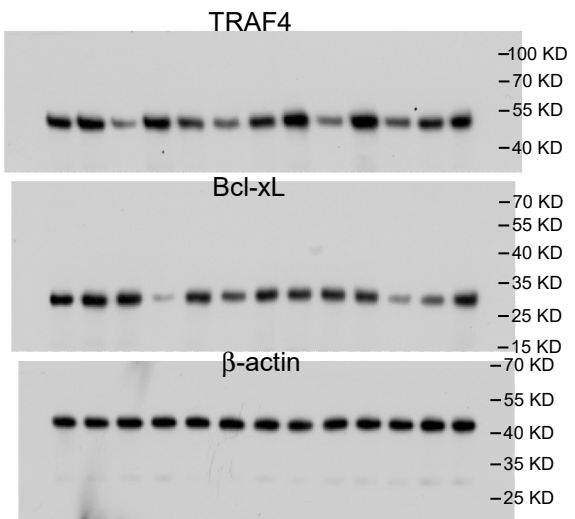

**Supplementary Figure 6B**

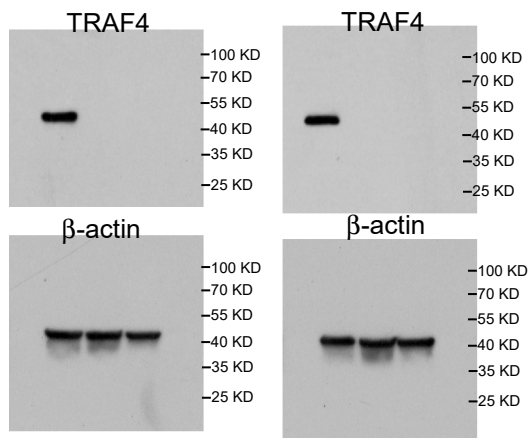

Supplement: 41419_2023_5637_MOESM2_ESM.pdf [file 41419_2023_5637_MOESM2_ESM.pdf]
